1 **Integrin  $\beta$ 1 optimizes diabetogenic T cell migration and function in the pancreas**

2

3 <sup>1,2\*</sup>#Gabriel Espinosa-Carrasco, <sup>1\*</sup>Cécile Le Saout, <sup>2</sup>Pierre Fontanaud, <sup>2</sup>Aurélien Michau,

4 <sup>2</sup>Patrice Mollard, <sup>1§</sup>Javier Hernandez, <sup>2§</sup>Marie Schaeffer

5

6 <sup>1</sup>INSERM U1183, Institute for Regenerative Medicine and Biotherapy, University of

7 Montpellier, Montpellier, France;

8 <sup>2</sup>Institute of Functional Genomics, CNRS, INSERM U1191, University of Montpellier, F-

9 34094 Montpellier, France

10

11 \*These authors contributed equally to this work

12 §Co-corresponding authors

13 Primary corresponding author: Dr. Marie Schaeffer, Inserm U1191, Institute of Functional

14 Genomics, Montpellier 34094, France

15 Marie.Schaeffer@igf.cnrs.fr

16 Corresponding author: Dr. Javier Hernandez, Inserm U1183, Institute for Regenerative

17 Medicine and Biotherapy, Montpellier 34295, France

18 francisco-javier.hernandez@inserm.fr

19

20 #Current address: Memorial Sloan Kettering Cancer Center Sloan Kettering Institute,

21 Zuckerman Research Center, New York, NY 10021, USA

22 Running title: T cell interstitial migration in the diabetic pancreas

23 **ABSTRACT**

24 T cell search behavior is dictated by their need to encounter their specific antigen to eliminate  
25 target cells. However, mechanisms controlling effector T cell motility are highly tissue-  
26 dependent. Specifically, how diabetogenic T cells encounter their target beta cells in dispersed  
27 islets throughout the pancreas during autoimmune diabetes remains unclear. Using intra-vital  
28 2-photon microscopy in a mouse model of diabetes, we found that CXCR3 chemokine  
29 downregulated CD8<sup>+</sup> T cell motility specifically within islets, promoting effector cell  
30 confinement to their target sites. In contrast, T cell velocity and directionality in the exocrine  
31 tissue were enhanced along blood vessels and extra-cellular matrix fibers. This guided  
32 migration implicated integrin-dependent interactions, since integrin blockade impaired  
33 exocrine T cell motility. In addition, integrin  $\beta$ 1 blockade decreased CD4<sup>+</sup> T cell effector  
34 phenotype specifically in the pancreas. Thus, we unveil an important role for integrins in the  
35 pancreas during autoimmune diabetes that may have important implications for the design of  
36 new therapies.

37

38

39 **Keywords:** autoimmunity, T cell migration, Type 1 diabetes, imaging, *in vivo*

40

41

## 42 INTRODUCTION

43

44 Immune responses implicate sequential encounters between T cells and their specific (or  
45 cognate) antigen in different body compartments to ensure efficient T cell priming, activation,  
46 and antigen clearance (1,2). However, the frequency of naïve T cells specific for a given antigen  
47 is low (3), and antigen abundance in target tissues may be variable and/or spatially restricted.  
48 Thus, T cell search behavior is driven by the need to actively explore the environment and  
49 locate cognate antigens. Since T cell migration patterns depend on cell-intrinsic parameters,  
50 context-dependent micro-environmental chemotactic cues and tissue-dependent structural  
51 features (4,5), empirical studies are required to identify T cell search mechanisms in specific  
52 disease settings. Given the importance of T cell search strategies in target cell clearance (1,2),  
53 mechanisms involved may constitute promising new therapeutic targets.

54 Dynamics and mechanisms of T cell migration leading to initial antigen encounter in  
55 secondary lymphoid organs are best characterized (4,6,7). In lymph nodes (LNs), the frequency  
56 of naïve antigen-specific T cells is low (3) and migration patterns must optimize the likelihood  
57 of a productive encounter with a cognate antigen-bearing antigen presenting cell (APC). Hence,  
58 naïve T cells typically display a high velocity dependent on chemokines and interactions with  
59 dendritic cells (DCs) (8,9). They migrate following a “Brownian” random walk intrinsically  
60 encoded (7,10) and guided by a network of fibroblast reticular cells (FRCs) (11). This ensures  
61 efficient sampling of a multitude of APCs (6) to promote rare cognate antigen encounter and  
62 naïve T cells activation. Activated effector T cells with reprogrammed expression of adhesion  
63 molecules and chemokine receptors then migrate to peripheral tissues (12), where they usually  
64 accumulate in large numbers and need to search for their spatially-restricted cognate antigen  
65 (3), to maintain effector functions (13) and eliminate target cells (14).

66 While the unique LN architecture facilitates antigen-T cell encounters, peripheral tissue  
67 geometry and composition greatly impact T cell migratory patterns and speed (1,10,15–17). For

68 instance, vascular network, APC networks, and the extra-cellular matrix (ECM) architecture  
69 influence T cell interstitial trafficking through physical or/and adhesive guidance (15,17–19).  
70 While adhesion-dependent mechanisms are not required for interstitial migration and T cell  
71 motility in LNs is integrin-independent (20,21), T cells are able to switch migration modes *in*  
72 *vitro* (22) and inflammation-mediated changes in ECM composition in peripheral tissues are  
73 able to induce integrin-dependent T cell trafficking (1). Thus, predicting disease-dependent  
74 mechanisms controlling T cell motility in the periphery remains impossible, although these may  
75 play a crucial role in target cell clearance (1,2).

76         During type 1 diabetes (T1D), an autoimmune disease leading to destruction of insulin-  
77 producing pancreatic beta cells, beta cell-specific T cells become activated in the draining  
78 lymph nodes (23). Effector T cells then migrate to the pancreas and extravasate both within  
79 islets (24) and at post-capillary venules in the exocrine tissue (14). Furthermore, effector T cells  
80 have been shown to displace from one islet to another (14). These observations indicate that  
81 migration of T cells in the exocrine tissue to reach dispersed target islets is essential for disease  
82 progression. However, mechanisms governing their motility remain unclear. Recent work in a  
83 viral induced mouse model of diabetes described diabetogenic T cell motility as a Brownian-  
84 type random walk around islets (14), whereas in NOD mice they appear to migrate along blood  
85 vessels (19). Given the extensive ECM remodeling and the key role of ECM organization in  
86 T1D pathogenesis (25), we sought to investigate mechanisms of effector T cell interstitial  
87 migration in the pancreas during T1D onset, using intravital 2-photon imaging in a mouse  
88 model of autoimmune diabetes.

89

## 90 **MATERIAL AND METHODS**

91

### 92 **Ethical Statement**

93 Animal studies were conducted according to the European guidelines for animal welfare  
94 (2010/63/EU). Protocols were approved by the Institutional Animal Care and Use Committee  
95 (CEEA-LR-1190 and -12163) and the French Ministry of Agriculture (APAFIS#3874).

96

### 97 **Mice**

98 Mice were bred in specific-pathogen-free facility and housed in conventional facility during  
99 experimentation. The transgenic mouse model of diabetes (26,27) involved InsHA (28), Clone  
100 4 TCR (MHC class I-restricted) (29), and HNT TCR (MHC class II-restricted) mice (30) (from  
101 Prof. Sherman, The Scripps Research Institute, San Diego, USA)(27), RIPmCherry mice (31)  
102 (from National Institute of Medical Research, London, UK), and  $\beta$ -actin-GFP and -CFP mice  
103 (Jackson Laboratory). Clone 4 TCR Thy1.1 x  $\beta$ -actin-GFP, HNT TCR Thy1.1 x  $\beta$ -actin-CFP,  
104 and InsHA x RIP-mCherry mice on BALB/c x C57BL/6 background 10-16 weeks old were  
105 used (27). Littermate males and females were used whenever possible and homogeneously  
106 mixed between experimental groups.

107

### 108 **T cell isolation, adoptive transfer and diabetes monitoring**

109 Equal numbers ( $2-3 \times 10^6$  cells/recipient) of naïve CD8<sup>+</sup> and CD4<sup>+</sup> T cells isolated from Clone  
110 4 TCR Thy1.1 x  $\beta$ -actin-GFP and HNT TCR Thy1.1 x  $\beta$ -actin CFP mice, respectively, were  
111 injected i.v. into InsHA x RIPmCherry mice sub-lethally irradiated (4.5 Gy) 24 h before in a  
112 therapeutic irradiator (Varian), as described (27). Mice were used for intra-vital imaging,  
113 sacrificed at day 10 for T cell characterization or monitored for diabetes onset. Recipient mice  
114 blood glucose levels were measured using a glucometer (AccuCheck).

115

116 ***In vivo* antibody and peptide treatment**

117 Anti-CXCR3 (armenian hamster IgG, BioXcell) or isotype control polyclonal armenian  
118 hamster IgG (BioXcell) were injected i.v. (300 µg/mouse) on day 8 after T cell transfer 1 h  
119 prior to imaging *in vivo*. Anti-β<sub>1</sub> integrin (Hmβ<sub>1</sub>-1, eBioscience) or isotype control armenian  
120 hamster IgG H4/8 (eBioscience) (100 µg/mouse) were injected i.v. on day 8 after T cell transfer  
121 1 h prior to imaging. GRGDS peptide or control reverse SDGRG peptide (Sigma) (500  
122 µg/mouse) were injected i.v. 10 min prior to imaging. For characterization of donor T cells by  
123 FACS, anti-β<sub>1</sub> integrin or isotype control antibody were injected i.p. on days 8 (200 µg/mouse)  
124 and 9 (100 µg/mouse) and mice killed at day 10 after T cell transfer.

125

126 **Surgery and intra-vital imaging**

127 All experiments used normoglycemic mice. Animals were anesthetized by injection of  
128 ketamine/xylazine (0.1/0.02 mg/g). Pancreas was exteriorized by surgery as described (27,31).  
129 Fluorescence was visualized using a Zeiss 7MP 2-photon microscope adapted with an M Plan  
130 Apo NIR ×20 objective (0.4 NA, Mitutoyo). Excitation was achieved using a Ti:Sapphire  
131 Chameleon Laser (Coherent) tuned to either 820 nm (mCherry, mCherry-GFP-CFP excitation  
132 and second harmonic generation (SHG)), 850 nm (rhodamine-GFP-CFP) or 880 nm (GFP-  
133 CFP). Fluorescence was captured using GaAsP PMTs at 460-500 nm for CFP, 500-550 nm for  
134 GFP, 610-700 nm for mCherry and rhodamine, and < 410 nm for SHG. Surface islets (< 100  
135 µm) were identified using mCherry or by light contrast. Tissue viability was verified by  
136 fluorescent dextran injection i.v. (27).

137

138 **Image data analysis**

139 Stacks 150 to 250 µm thick (Z steps of 3 µm) were acquired every 30 s to 1 min during 10 to  
140 27 min. Movies were stabilized using Huygens Essential (SVI). Measurements were performed

141 in at least 3 independent experiments. Average velocities and mean squared displacements  
142 (MSD) of individual T cells were obtained using Imaris (Bitplane). Directionality indexes (ratio  
143 between the distance between start and end time points in a straight line and the total length of  
144 the migratory path) were calculated using a routine programmed in MATLAB (18). Similarly,  
145 T cell coordinates obtained using Imaris were imported in MATLAB to measure displacement  
146 of T cells towards or away from islet centroids, to project T cell orientation of displacement  
147 vectors on a circle, to calculate angle differences between T cells displacement vector  
148 projections on the XY plane and direction of vessels, and to generate graphs of XY projections  
149 of T cell tracks, using custom programs (available upon demand). Areas with similar infiltration  
150 (100-320 total number of tracks/0.05 mm<sup>3</sup> imaging volume) were compared. Cell tracks lasting  
151 less than 4 min were excluded. No exclusion was made based on velocity.

152 To analyze migratory patterns of T cell populations, equations describing the major  
153 models of diffusion of particles ( $Y = B1*t + (B2*t)^\alpha$  with  $\alpha = 2$  for directed or ballistic motion,  
154  $\alpha = 1$  and  $B2 = 0$  for Brownian random walk,  $0 < \alpha < 1$  and  $B1 = 0$  for sub-diffusive or  
155 anomalous random walk,  $1 < \alpha < 2$  and  $B1 = 0$  for Lévy-type super-diffusive random-walk, and  
156  $Y = \text{Plateau}*(1-\exp(-K*t))$  for confined motility) (32) applied to the description of T cells  
157 migration (4) were used as models of non-linear regression to fit mean squared displacement  
158 (MSD) increase over time in GraphPad Prism (t is time, B1 and B2 are fitting parameters, K is  
159 the constant rate). In each case, the model providing the best fit (highest R<sup>2</sup>) was chosen to  
160 describe the pattern of motility.

161

## 162 **Flow Cytometry**

163 For T cell phenotyping, single cell suspensions from pancreatic lymph nodes or pancreas  
164 infiltrating cells were prepared and stained as described (26). For intracellular cytokine staining,  
165 T cells were restimulated *ex vivo* with HA-specific peptides during 5 h before staining as

166 previously described (26). The mAbs used were: anti-CD61 (ITG $\beta$ 3)-FITC, anti-CD51  
167 (ITG $\alpha$ V)-PE, anti-CD49e (ITG $\alpha$ 5)-APC, anti-CD183 (CXCR3)- Alexa Fluor 780, anti-CD29  
168 (ITG $\beta$ 1)-Pacific blue (BioLegend, San Diego, CA); anti-CD4-V500, anti-CD4-FITC, anti-  
169 CD90.1 (Thy1.1)-PerCP, anti-CD90.1 (Thy1.1)-V450, anti-CD8a-V450, anti-CD62L-APC,  
170 anti-IL-2-APC, anti-IFN $\gamma$ -PE (BD Pharmingen); anti-CD8a-APC-Alexa Fluor 780, anti-IL-17-  
171 Alexa Fluor, anti-CD25-APC-Alexa Fluor 780 and anti-KLRG1-PE-Cy7 (eBioscience). Cells  
172 were analyzed on a FACSCanto II or a LSR Fortessa apparatus using Diva software (BDB).

173

### 174 **Confocal imaging**

175 Pancreas preparation and antibody labeling were as described (33). Antibodies used were:  
176 hamster anti-CD11c (clone N418 1:300, eBioscience); rat anti-F4/80 (clone MCA4976 1:200,  
177 BioRad), rabbit anti-insulin (1:500, Cell Signaling); rat anti-endomucin (1:500, Santa Cruz  
178 Biotechnology); rabbit anti-fibronectin (clone AB1942 1:5000, Chemicon); mouse anti-  
179 collagen I (1:300, Abcam). Nuclei were labeled using dapi (Sigma). One to four slices were  
180 randomly selected from > 3 animals/group. Images were acquired using a Zeiss LSM 780  
181 confocal microscope and analyzed using Imaris (Bitplane) and ImageJ (NIH).

182

### 183 **Statistical analysis**

184 Values are represented as mean  $\pm$  SEM. Statistical tests were performed using GraphPad  
185 Prism. Normality was tested using D'Agostino-Pearson test, and comparisons were made  
186 using either unpaired Student's t-test, or two-tailed Mann-Whitney U-test, as appropriate.  
187 Multiple comparisons were made using one-way ANOVA followed by Bonferroni's post-hoc  
188 test. To analyze uniformity of distribution, the Hodjes-Ajne test for circular uniformity was  
189 used in MATLAB. P values were considered significant at P<0.05\*, 0.01\*\*, 0.001\*\*\*,  
190 0.0001\*\*\*\*.



191 **RESULTS**

192

193 **Effector T cells follow a Lévy-walk type of motility in the exocrine tissue**

194 To study antigen-specific T cell behavior and motility patterns in the pancreas during  
195 autoimmune diabetes, we used the InsHA transgenic mouse model (34) in which fluorescent  
196 labels were introduced. We imaged influenza hemagglutinin (HA) antigen-specific CD8+ and  
197 CD4+ T cells attacking HA-expressing beta cells utilizing *in vivo* 2-photon microscopy (27,31).  
198 Co-transfer of naïve Clone 4-GFP CD8+ and HNT-CFP CD4+ T cells into sub-lethally  
199 irradiated InsHA-mCherry hosts reproducibly induced pancreas infiltration by day 8 post-  
200 transfer (Fig. S1A), and hyperglycemia by day 10 (Fig. S1B). We were able to image beta cells,  
201 Clone 4-GFP CD8+ and HNT-CFP CD4+ T cells in pre-diabetic InsHA-mCherry mice and  
202 track T cell motility *in vivo* (Fig. 1A, Video S1). At day 8 post-transfer, HA-specific T cells in  
203 endocrine tissue (in islets) displayed lower average velocities than in the surrounding exocrine  
204 tissue (ref) and low directionality indexes ( $< 0.2$ ) (ratio between cell's displacement, defined as  
205 the straight line between original and final positions, and cell's total track length) (Fig. 1B-C),  
206 as expected for T cells in presence of their cognate antigen (35). To describe T cell migration  
207 patterns, particle diffusion models have classically been used (32). T cells mostly migrate either  
208 following a Brownian-type random walk or a super-diffusive Lévy-type motility (characterized  
209 by stretches of directed motility in random directions interleaved by pauses) (4). Occasionally,  
210 T cells can display restrained motility (anomalous random walk or confinement) (8) or fully  
211 ballistic migration (in a straight path) (36), depending on imaging duration and the tissue  
212 analyzed. These models are based on the representation of cells mean square displacement  
213 (MSD) versus time (4). We fitted the experimental data with the different equations describing  
214 different models of diffusion (32) and identified the best fit based on the  $R^2$  values. While a  
215 complete Brownian-type random walk yields a linear regression between these parameters, a

216 directed motility or a super-diffusive motility typical of a Lévy-walk are characterized by a  
217 power law curve, and confinement leading to sub-diffusive behavior yields a hyperbolic-shaped  
218 curve. Analyses of MSD of T cell populations versus time in islets revealed CD8<sup>+</sup> T cell  
219 migration was best fitted with a model of confined motility, while CD4<sup>+</sup> T cells migrated  
220 following a sub-diffusive (also called anomalous or restrained) random walk (Fig. 1D). In the  
221 exocrine tissue, mean T cell directionality index was in the 0.4 range (Fig. 1C), consistent with  
222 values reported for CTLs in a different model of insulinitis (14), and indicative of an apparent  
223 lack of directionality. However, Clone 4-GFP and HNT-CFP T cell motility in the exocrine  
224 pancreas of InsHA-mCherry mice did not follow the described Brownian-type strictly diffusive  
225 random motility (14) and MSD of both T cell populations versus time (4) were best fitted with  
226 a model of super-diffusive Lévy-type motility, closely tending to a directed ballistic migration  
227 (36) (Fig. 1E-F, Video S2).

228

### 229 **Contribution of chemotactic cues to T cell exploratory migration in the pancreas**

230 Chemotaxis refers to the capacity of T cells to adapt their migratory pattern and motility  
231 following sensing of extrinsic cues produced by other immune cells or tissue specific cells. To  
232 analyze whether the super-diffusive motility in the exocrine tissue was informed by chemotactic  
233 cues produced within infiltrated islets, which are important sources of chemokines (37), and  
234 whether T cells were able to collectively migrate towards islets, we analyzed displacement of  
235 T cells towards (IN) or away (OUT) from islet centroids, as a function of T cell initial position  
236 (Fig. 2A-B). Proximity to islets did not bias T cell orientation of movement, as described in  
237 another model (14). Furthermore, although T cells migrated in rather straight paths in the  
238 exocrine tissue, cells did not collectively migrate in one particular direction in movies, as the  
239 distribution of compiled T cell vector orientations in different movies did not statistically differ

240 from a uniform circular distribution (Fig. 2C-E). Thus, T cells do not seem to collectively  
241 answer to a large scale chemo-attractive gradient.

242 An alternative possibility may be that T cells are able to respond to chemotactic cues  
243 locally (24). Indicative of this, T cells were able to follow each other for extended periods of  
244 time (> 5 min) in the exocrine tissue (Fig. S2A, Video S3). These events were detectable in all  
245 movies with infiltration > 100 cells/0.05  $\mu\text{m}^3$  imaging volume (1-8 events/15 min movie, total  
246 94 events over a total movie time of 4 h). Local cues may be either produced by the “leading”  
247 T cell, inducing other T cell to follow, or both T cells may be responding to the same chemo-  
248 attractive source. While T cells search for their cognate antigen, APCs are able to recruit them  
249 through secretion of different chemokines (38–40). CXCL10 is the most abundant chemokine  
250 expressed in infiltrated pancreas in mouse models, including InsHA, as well as in type 1 diabetic  
251 patients, and this chemokine contributes to T cell recruitment (37,41,42). The corresponding  
252 chemokine receptor CXCR3 was expressed by Clone 4-GFP CD8<sup>+</sup> T cells infiltrating the  
253 pancreas and to a much lower extent by HNT-CFP CD4<sup>+</sup> T cells (Fig. S2B). To determine  
254 whether signaling through this axis was involved in T cell migration in the pancreas, we treated  
255 transferred mice with anti-CXCR3 mAb 1h prior *in vivo* imaging. We found that this treatment  
256 had minor effects on T cell average velocities in the exocrine tissue (Fig. 2F) without changing  
257 the nature of migration statistics (Fig. 2G). In contrast, treatment with anti-CXCR3 mAb  
258 increased Clone 4-GFP CD8<sup>+</sup> T cell motility in islets (Fig. 2H) and significantly reduced their  
259 recruitment into the pancreas (Fig. S2C). Thus, while CXCR3 has minor involvement in CD8<sup>+</sup>  
260 and CD4<sup>+</sup> T cell migratory pattern in the exocrine tissue it actively participates in CD8<sup>+</sup> T cell  
261 recruitment and downregulates their velocity in islets, presumably to promote confinement of  
262 effector cells and local accumulation at sites of chemoattractant production (35) and/or cognate  
263 antigen presence.

264

265 **Blood vessels and ECM fibers provide a scaffold for T cell directed motility in the exocrine**  
266 **tissue *in vivo***

267 Diabetogenic T cells have been shown to extravasate and infiltrate the pancreas both  
268 within islets (24) and from post-capillary venules in the exocrine tissue (14). In accordance with  
269 this, early infiltration events here were limited to islets and perivascular areas (Fig. S3A). As  
270 infiltration progressed, large accumulations of effector CD4<sup>+</sup> and CD8<sup>+</sup> T cells could be  
271 observed within islets and at the level of endomucin-expressing pancreatic venules on fixed  
272 pancreas sections (Fig. S3B) and *in vivo* (Fig. S3C). Along large vessels (> 100  $\mu\text{m}$  in diameter),  
273 T cells displayed linear tracks (Fig. 3A-D) (Video S4). To quantify alignment between T cell  
274 tracks and vessels, angle differences between track displacement vectors and vessel direction  
275 (1) (white lines, Fig. 3D) were measured for T cells close to or away from vessels (< 30  $\mu\text{m}$  or  
276 > 30  $\mu\text{m}$ ) (Fig. 3E). Compared to other T cells in the imaging field, T cells in close proximity  
277 to vessels presented lower angle differences with vessels orientation, increased velocity, and  
278 fully ballistic motility (Fig. 3E-G). Thus, the vascular structure strongly influences all  
279 parameters of T cell migration in the pancreas.

280 Different components of the ECM have been involved in guiding effector T cells  
281 migration through ligand-receptor interactions (1,15,16). Because vessels are usually lined with  
282 dense accumulation of ECM fibers, we analyzed T cell motility *in vivo* on ECM fibers  
283 visualized by second harmonic generation (SHG). We found the T cells were able to follow  
284 dense ECM bundles between vessels (Fig. 4A, Video S5). In addition, ECM fibers could be  
285 observed in the infiltrated exocrine tissue, although SHG was limited to the tissue surface (Fig.  
286 4B, Video S6). Because ECM composition may be modulated by inflammation (25), we  
287 investigated whether pancreas infiltration was accompanied by changes in the ECM.  
288 Fibronectin, a key component of the ECM and major substrate for integrins (1), could be  
289 evidenced in the pancreas of non-treated control mice and localized to the perivascular space,

290 as well as the interstitial tissue around cells in the exocrine pancreas (Fig. 4C). At day 8 post T  
291 cell transfer, we found an increase in fibronectin deposition at T cell infiltration sites (Fig. 4C).  
292 This was also true for other components of the ECM, such as collagen I (Fig. S4A). Importantly,  
293 assessment of Clone4-GFP and HNT-GFP T cells localization revealed a generalized close  
294 apposition to fibronectin fibers in pre-diabetic mice (Fig. 4D). Other changes in the micro-  
295 environment accompanying T cell infiltration, and locally correlated with fibronectin  
296 accumulation, included important APCs recruitment, as evidenced by dense CD11c and F4/80  
297 labeling around and within islets and around blood vessels (Fig. S4B). Recruited T cells  
298 therefore migrate around a restructured scaffold of ECM fibers and leucocytes.

299

### 300 **Integrin blockade alters directed effector T cell migration in the pancreas and impairs** 301 **their effector phenotype**

302 RGD binding integrins are known receptors for ECM proteins and in particular for  
303 fibronectin. Therefore, we assessed the expression of those that have been reported to be more  
304 frequently present on diabetogenic T cells (1) in the infiltrating effector T cells of our model.  
305 We found that the vast majority of both Clone 4-GFP CD8<sup>+</sup> and HNT CD4<sup>+</sup> T cells expressed  
306 high levels of  $\beta_1$  and  $\alpha_v$  integrins (Fig. S5). We hypothesized that integrins could be involved  
307 in guiding effector T cell motility in the pancreas. We tested this hypothesis by injecting a  
308 blocking anti- $\beta_1$  integrin mAb and found that shortly post-injection (40 min), average velocities  
309 of both Clone 4 and HNT T cells were significantly reduced compared to isotype control  
310 antibody-treated animals (~20 %) (Fig. 5A-C, Video S7), as well as the directionality indexes  
311 of T cell tracks (Fig. 5D). In addition, although T cells MSD versus time curves were still best  
312 fitted with the Lévy-type random model, curves tended to linearize and the fit for a Brownian-  
313 type random motility improved in treated animals (Fig. 5E). To further assess involvement of  
314 integrins in T cells motility in the pancreas, we treated animals prior to imaging (10 min) with

315 a peptide containing the RGD peptidic motif. Since this sequence is recognized by integrins on  
316 ECM fibers, treatment with RGD peptide broadly blocks integrins. We found that average T  
317 cell velocity was decreased compared to reverse DGR peptide treated-animals (Fig. S6A-B,  
318 Video S8) and super-diffusive motility was practically lost (Fig. S6C). This indicates that  
319 integrins contributes to T cell motility in the inflamed pancreas, although compensatory and/or  
320 additional mechanisms may exist (17,20).

321 Finally, we tested whether impaired effector T cell motility induced by  $\beta_1$  integrin  
322 blockade could affect functionality. Mice were treated with anti- $\beta_1$  integrin mAb at a time at  
323 which T cells had already infiltrated the pancreas (days 8 and 9 after transfer). At day 10, equal  
324 numbers of infiltrating Clone 4-GFP CD8<sup>+</sup> and HNT-CFP CD4<sup>+</sup> T cells were detected in the  
325 pancreas of treated compared to isotype control mice (Fig. 6A). Moreover, the phenotype and  
326 cytokine secretion potential of both donor CD8<sup>+</sup> and CD4<sup>+</sup> T cells were indistinguishable in  
327 the draining lymph nodes of the pancreas (Fig 6B-C). These results indicate that treatment at  
328 this time point did not prevent activation and recruitment of effector cells into the pancreas. In  
329 contrast, pancreas infiltrating HNT-CFP CD4<sup>+</sup> T cells from treated mice displayed a significant  
330 reduction in the expression of key effector markers such as KLRG1 and CD25 (Fig. 6B).  
331 Additionally, these cells had lost the potential to secrete IL-2, an important effector cytokine  
332 (Fig. 6C). Interestingly, although the effector potential of Clone 4-GFP CD8<sup>+</sup> T cells remained  
333 unaltered, a marked reduction of the expression of CD25 was observed in treated mice, likely  
334 as a result of the decreased IL-2 secretion by helper CD4<sup>+</sup> T cells (Fig. 6C). Collectively, our  
335 data indicate that altered motility of diabetogenic T cells in the pancreas results in decreased  
336 effector functions *in situ*.

337 **DISCUSSION**

338

339 T cell migratory behavior stems from the need to search for their cognate antigen and plays a  
340 crucial role in antigen clearance. In various peripheral tissues (brain, liver, gut, pancreas), T  
341 cell migratory behavior has been described as a super-diffusive random walk or Lévy walk  
342 (4,14,40), characterized by steps of directed migration in random directions interleaved by  
343 pauses (43), to optimize rare target encounter. However, mechanisms governing T cell  
344 migration are context-dependent and leukocytes are able to switch migratory modes along with  
345 changing environmental conditions (1). This prevents the definition a generalized model for T  
346 cell interstitial migration in inflamed peripheral tissues. In addition, mechanisms governing  
347 lymphocyte dynamics are intimately linked to the maintenance of T cell effector function (1).  
348 While effector T cells need to reach dispersed target islets in the pancreas during autoimmune  
349 diabetes, mechanisms governing their motility remained unclear. Using 2-photon microscopy  
350 *in vivo* to visualize TCR transgenic HA-specific CD8<sup>+</sup> and CD4<sup>+</sup> T cells in the pancreas of mice  
351 expressing HA in beta cells, we found that both T cell types followed a super-diffusive Lévy-  
352 type mode of migration in the exocrine tissue without a preferred concerted orientation. In  
353 contrast, the islet environment restrained T cell trafficking through a mechanism involving  
354 CXCR3 chemokine receptor. T cell infiltration induced local fibrosis, marked by fibronectin  
355 deposition. Both CD8<sup>+</sup> and CD4<sup>+</sup> T cells were in close apposition to vessels and fibronectin  
356 fibers, which provided adhesive guidance and contributed to the super-diffusive migration in  
357 the exocrine pancreas through, at least partially, an integrin-dependent mechanism. Finally,  
358 integrin-dependent T cell-ECM interactions contributed to the maintenance of T cell effector  
359 function in the pancreas.

360

361 In search for their cognate antigen, T cells can follow a “Brownian” random walk mode  
362 of migration in the periphery, including in the pancreas (6,14). Here, however, T cells followed  
363 a super-diffusive, almost ballistic, mode of migration (4), which arguably constitutes the most  
364 efficient strategy of random search processes (44). The different migration pattern observed in  
365 the exocrine tissue by Coppieters et al. may rise from model-specific differences (autoimmune  
366 diabetes used was induced using viral infection) and/or different length of movie duration to  
367 analyze T cell MSD (< 7 min vs. 12-16 min here) (14). Strikingly, T cells did not collectively  
368 migrate in a particular direction as no overall orientation bias of T cell tracks was observed,  
369 including towards islets, although these are major sources of chemokines (37). We found that,  
370 unlike in LN (45), G $\alpha$ i-coupled receptors involved in chemokine signaling, such as CXCR3  
371 receptors, were not central in shaping T cell motility in the exocrine pancreas. CXCR3 blockade  
372 slightly reduced T cell velocity without affecting migration mode, as reported previously in the  
373 brain (43). On the local scale, the fact that T cells were able to follow each other suggests that  
374 they may follow paths of least resistance. Alternatively, like recently described for neutrophils  
375 (46), T cells may be able to deposit chemokine trails that other T cells may be able to respond  
376 to, although this remains unclear.

377

378 Although the original assumption was that large scale diffusive chemokine gradients  
379 would provide cues for directed motility, experimental evidence of collective T cell migration  
380 towards sources of high chemokine production is scarce. In contrast, chemotactic cues are able  
381 to modulate T cell trajectories in different ways, such as through modulation of T cell  
382 retention/arrest rather than directionality (35). In accordance with this, large accumulation of T  
383 cells were observed in islets and CXCR3 blockade increased T cell velocity in islets, as beta  
384 cells are the main source of CXCL9/10 in the pancreas (37) The chemokine-rich environment  
385 of islets therefore promotes a downregulation of T cell velocity to accumulate and confine



386 effector cells at target sites, rather than attract distant T cells. The dense accumulation of T cells  
387 at the level of post-capillary venules in the exocrine tissue could be explained by the described  
388 vascular leakiness (14), and presence along vessels of CD11c<sup>+</sup> and F4/80<sup>+</sup> cells, which are  
389 well-known chemokine sources that could favor confinement of T cells.

390         Similar to what was described in the inflamed skin (1), the vascular tree provided a  
391 scaffold for T cell migration in the pancreas and strongly contributed to the directional motility  
392 *in vivo*. In addition, HA-specific CD8<sup>+</sup> and CD4<sup>+</sup> T cell infiltration induced ECM remodeling,  
393 likely mediated by recruited macrophages (47). This remodeling included fibronectin  
394 accumulation, a major substrate for integrins (1). The fact that anti- $\beta$ 1 integrin mAb treatment  
395 affected both velocity and directionality of T cells indicates that lymphocytes do not only align  
396 along paths of least resistance in the pancreas, but that fibronectin fibers also provide adhesive  
397 guidance. Effects observed were in line with previous studies of integrin-blockade on T cell  
398 motility (48). By contrast with full integrin-dependency described in the inflamed skin (1), our  
399 results suggest the implication of complementary mechanisms of migration for T cells in the  
400 pancreas. Once the described chemokine-dependent up-regulation of integrin molecules  
401 allowing T cell entry at peripheral sites has been achieved (49), infiltrated T cell directional  
402 migration in the pancreas is mostly independent of CXCR3-mediated chemotactic signals.  
403 Remaining migration detected in the presence of integrin-blocking antibody may stem from T  
404 cells intrinsic capacity to maintain a directed motion (50), other GPCR-mediated chemokine  
405 signaling (51), and/or other receptor-ligand interactions, although this remains to be clarified.

406         Finally, integrin  $\beta$ 1 blockade at a time when diabetogenic T cells had already infiltrated  
407 the pancreas resulted in a decline of CD4<sup>+</sup> T cell effector function. Diabetogenic T cells require  
408 antigen-mediated contacts with APCs in the pancreas to retain effector function over time  
409 (27,52). A likely explanation may be that impairing ECM guided motility would alter effector  
410 CD4<sup>+</sup> T cell/APC interactions resulting in decrease in effector function. Alternatively, integrin

411 signaling triggered by direct interaction with ECM fibers might be required for the maintenance  
412 of effector functions in the pancreas, as described in other settings (53,54).

413

414 In summary, we show that during autoimmune insult to the pancreas, islet-antigen  
415 specific T cells display super-diffusive motility in the exocrine tissue implicating integrin-  
416 dependent T cell-ECM fibers interactions contributing to optimization of islet encounter and  
417 maintenance of effector functions, and that the islet chemokine-rich environment promotes the  
418 confinement of effector T cells, rather than their recruitment. We thus reveal a role for integrins  
419 in the pancreas that may have important implications for the design of new therapeutic strategies  
420 against T1D.

421

422 **AUTHOR CONTRIBUTIONS**

423 GEC, CLS, JH and MS designed experiments; GEC, CLS, AM and MS performed experiments;  
424 GEC, CLS, PF, JH, and MS analyzed data; PM, JH and MS wrote the manuscript.

425

426 **ACKNOWLEDGMENTS**

427 The authors declare no conflict of interest. The authors would like to thank C. Lafont, P. Samper  
428 and E. Galibert, Institute of Functional Genomics, Montpellier, France, for technical assistance,  
429 the animal facility staff (RAM), and Montpellier Imaging Platform (IPAM). Authors were  
430 supported by grants from the Agence Nationale de la Recherche (ANR BETA-DYN JCJC13 to  
431 MS, ANR MITOSTEM to JH, France-BioImaging ANR-10-INBS-04 to PM), Société  
432 Francophone du Diabète, INSERM, CNRS, University of Montpellier, and Région Occitanie.

433

434

435

436

437

438

439

440

441

442

443

444

445 **REFERENCES**

- 446 1. Overstreet MG, Gaylo A, Angermann BR, Hughson A, Hyun Y-M, Lambert K,  
447 Acharya M, Billroth-Maclurg AC, Rosenberg AF, Topham DJ, et al. Inflammation-  
448 induced interstitial migration of effector CD4<sup>+</sup> T cells is dependent on integrin  $\alpha$ V. *Nat*  
449 *Immunol* (2013) **14**:949–58. doi:10.1038/ni.2682
- 450 2. Ray SJ, Franki SN, Pierce RH, Dimitrova S, Kotliansky V, Sprague AG, Doherty PC,  
451 De Fougères AR, Topham DJ. The Collagen Binding  $\alpha$ 1 $\beta$ 1 Integrin VLA-1  
452 Regulates CD8 T Cell-Mediated Immune Protection against Heterologous Influenza  
453 Infection. *Immunity* (2004) **20**:167–179. doi:10.1016/S1074-7613(04)00021-4
- 454 3. Blattman JN. Estimating the Precursor Frequency of Naive Antigen-specific CD8 T  
455 Cells. *J Exp Med* (2002) **195**:657–664. doi:10.1084/jem.20001021
- 456 4. Krummel MF, Bartumeus F, Gérard A. T cell migration, search strategies and  
457 mechanisms. *Nat Rev Immunol* (2016) **16**:193–201. doi:10.1038/nri.2015.16
- 458 5. Gérard A, Patino-Lopez G, Beemiller P, Nambiar R, Ben-Aissa K, Liu Y, Totah FJ,  
459 Tyska MJ, Shaw S, Krummel MF. Detection of rare antigen-presenting cells through T  
460 cell-intrinsic meandering motility, mediated by Myo1g. *Cell* (2014) **158**:492–505.  
461 doi:10.1016/j.cell.2014.05.044
- 462 6. Germain RN, Robey EA, Cahalan MD. A decade of imaging cellular motility and  
463 interaction dynamics in the immune system. *Science* (2012) **336**:1676–81.  
464 doi:10.1126/science.1221063
- 465 7. Cahalan MD, Parker I. Choreography of cell motility and interaction dynamics imaged  
466 by two-photon microscopy in lymphoid organs. *Annu Rev Immunol* (2008) **26**:585–  
467 626. doi:10.1146/annurev.immunol.24.021605.090620
- 468 8. Worbs T, Mempel TR, Bölter J, von Andrian UH, Förster R. CCR7 ligands stimulate  
469 the intranodal motility of T lymphocytes in vivo. *J Exp Med* (2007) **204**:489–495.  
470 doi:10.1084/jem.20061706
- 471 9. Katakai T, Habiro K, Kinashi T. Dendritic cells regulate high-speed interstitial T cell  
472 migration in the lymph node via LFA-1/ICAM-1. *J Immunol* (2013) **191**:1188–99.  
473 doi:10.4049/jimmunol.1300739
- 474 10. Mrass P, Petravic J, Davenport MP, Weninger W. Cell-autonomous and environmental  
475 contributions to the interstitial migration of T cells. *Semin Immunopathol* (2010)  
476 **32**:257–274. doi:10.1007/s00281-010-0212-1
- 477 11. Mempel TR, Junt T, von Andrian UH. Rulers over Randomness: Stroma Cells Guide  
478 Lymphocyte Migration in Lymph Nodes. *Immunity* (2006) **25**:867–869.  
479 doi:10.1016/j.immuni.2006.11.002
- 480 12. Nolz JC, Starbeck-Miller GR, Harty JT. Naive, effector and memory CD8 T-cell  
481 trafficking: parallels and distinctions. *Immunotherapy* (2011) **3**:1223–1233.  
482 doi:10.2217/imt.11.100
- 483 13. Honda T, Egen JG, Lämmermann T, Kastentmüller W, Torabi-Parizi P, Germain RN.  
484 Tuning of Antigen Sensitivity by T Cell Receptor-Dependent Negative Feedback  
485 Controls T Cell Effector Function in Inflamed Tissues. *Immunity* (2014) **40**:235–247.  
486 doi:10.1016/j.immuni.2013.11.017
- 487 14. Coppieters K, Amirian N, Von Herrath M. Intravital imaging of CTLs killing islet cells  
488 in diabetic mice. *J Clin Invest* (2012) **122**:119–131. doi:10.1172/JCI59285

- 489 15. Wilson EH, Harris TH, Mrass P, John B, Tait ED, Wu GF, Pepper M, Wherry EJ,  
490 Dzierzinski F, Roos D, et al. Behavior of Parasite-Specific Effector CD8<sup>+</sup> T Cells in  
491 the Brain and Visualization of a Kinesin-Associated System of Reticular Fibers.  
492 *Immunity* (2009) **30**:300–311. doi:10.1016/j.immuni.2008.12.013
- 493 16. Boissonnas A, Fetler L, Zeelenberg IS, Hugues S, Amigorena S. In vivo imaging of  
494 cytotoxic T cell infiltration and elimination of a solid tumor. *J Exp Med* (2007)  
495 **204**:345–356. doi:10.1084/jem.20061890
- 496 17. Salmon H, Franciszkiewicz K, Damotte D, Dieu-Nosjean MC, Validire P, Trautmann  
497 A, Mami-Chouaib F, Donnadieu E. Matrix architecture defines the preferential  
498 localization and migration of T cells into the stroma of human lung tumors. *J Clin*  
499 *Invest* (2012) **122**:899–910. doi:10.1172/JCI45817
- 500 18. Schaeffer M, Han S-J, Chtanova T, van Dooren GG, Herzmark P, Chen Y, Roysam B,  
501 Striepen B, Robey EA. Dynamic imaging of T cell-parasite interactions in the brains of  
502 mice chronically infected with *Toxoplasma gondii*. *J Immunol* (2009) **182**:6379–6393.  
503 doi:10.4049/jimmunol.0804307
- 504 19. Mohan JF, Kohler RH, Hill JA, Weissleder R, Mathis D, Benoist C. Imaging the  
505 emergence and natural progression of spontaneous autoimmune diabetes. *Proc Natl*  
506 *Acad Sci* (2017) **114**:E7776–E7785. doi:10.1073/pnas.1707381114
- 507 20. Woolf E, Grigorova I, Sagiv A, Grabovsky V, Feigelson SW, Shulman Z, Hartmann T,  
508 Sixt M, Cyster JG, Alon R. Lymph node chemokines promote sustained T lymphocyte  
509 motility without triggering stable integrin adhesiveness in the absence of shear forces.  
510 *Nat Immunol* (2007) **8**:1076–1085. doi:10.1038/ni1499
- 511 21. Lämmermann T, Bader BL, Monkley SJ, Worbs T, Wedlich-Söldner R, Hirsch K,  
512 Keller M, Förster R, Crichtley DR, Fässler R, et al. Rapid leukocyte migration by  
513 integrin-independent flowing and squeezing. *Nature* (2008) **453**:51–5.  
514 doi:10.1038/nature06887
- 515 22. Jacobelli J, Friedman RS, Conti MA, Lennon-Dumenil A-M, Piel M, Sorensen CM,  
516 Adelstein RS, Krummel MF. Confinement-optimized three-dimensional T cell  
517 amoeboid motility is modulated via myosin IIA-regulated adhesions. *Nat Immunol*  
518 (2010) **11**:953–61. doi:10.1038/ni.1936
- 519 23. Tang Q, Adams JY, Tooley AJ, Bi M, Fife BT, Serra P, Santamaria P, Locksley RM,  
520 Krummel MF, Bluestone JA. Visualizing regulatory T cell control of autoimmune  
521 responses in nonobese diabetic mice. *Nat Immunol* (2006) **7**:83–92. doi:10.1038/ni1289
- 522 24. Calderon B, Carrero JA, Miller MJ, Unanue ER. Cellular and molecular events in the  
523 localization of diabetogenic T cells to islets of Langerhans. *Proc Natl Acad Sci U S A*  
524 (2011) **108**:1561–1566. doi:10.1073/pnas.1018973108
- 525 25. Bogdani M, Korpos E, Simeonovic CJ, Parish CR, Sorokin L, Wight TN. Extracellular  
526 Matrix Components in the Pathogenesis of Type 1 Diabetes. *Curr Diab Rep* (2014)  
527 **14**:1–11. doi:10.1007/s11892-014-0552-7
- 528 26. Le Saout C, Mennechet S, Taylor N, Hernandez J. Memory-like CD8<sup>+</sup> and CD4<sup>+</sup> T  
529 cells cooperate to break peripheral tolerance under lymphopenic conditions. *Proc Natl*  
530 *Acad Sci U S A* (2008) **105**:19414–19419. doi:10.1073/pnas.0807743105
- 531 27. Espinosa-Carrasco G, Saout C Le, Fontanaud P, Stratmann T, Schaeffer M, Hernandez  
532 J. CD4<sup>+</sup> T helper cells play a key role in maintaining CD8<sup>+</sup> T cell function in the  
533 pancreas. *Front Immunol* (2018) **8**:2001. doi:10.3389/fimmu.2017.02001
- 534 28. Lo D, Freedman J, Hesse S, Palmiter RD, Brinster RL, Sherman LA. Peripheral

- 535 tolerance to an islet cell-specific hemagglutinin transgene affects both CD4+ and CD8+  
536 T cells. *Eur J Immunol* (1992) **22**:1013–1022. doi:10.1002/eji.1830220421
- 537 29. Morgan DJ, Liblau R, Scott B, Fleck S, McDevitt HO, Sarvetnick N, Lo D, Sherman L  
538 a. CD8(+) T cell-mediated spontaneous diabetes in neonatal mice. *J Immunol* (1996)  
539 **157**:978–983.
- 540 30. Scott B, Liblau R, Degermann S, Marconi LA, Ogata L, Caton AJ, McDevitt HO, Lo  
541 D. A role for non-MHC genetic polymorphism in susceptibility to spontaneous  
542 autoimmunity. *Immunity* (1994) **1**:73–82. doi:10.1016/1074-7613(94)90011-6
- 543 31. Michau A, Hodson DJ, Fontanaud P, Guillou A, Espinosa-Carrasco G, Molino F,  
544 Peters CJ, Robinson IC, Le Tissier P, Mollard P, et al. Metabolism Regulates Exposure  
545 of Pancreatic Islets to Circulating Molecules In Vivo. *Diabetes* (2016) **65**:463–475.  
546 doi:10.2337/db15-1168
- 547 32. Saxton MJ, Jacobson K. SINGLE-PARTICLE TRACKING: Applications to Membrane  
548 Dynamics. *Annu Rev Biophys Biomol Struct* (1997) **26**:373–399.  
549 doi:10.1146/annurev.biophys.26.1.373
- 550 33. Schaeffer M, Langlet F, Lafont C, Molino F, Hodson DJ, Roux T, Lamarque L, Verdie  
551 P, Bourrier E, Dehouck B, et al. Rapid sensing of circulating ghrelin by hypothalamic  
552 appetite-modifying neurons. *Proc Natl Acad Sci U S A* (2013) **110**:1512–1517.  
553 doi:10.1073/pnas.1212137110
- 554 34. Hernández J, Aung S, Marquardt K, Sherman LA. Uncoupling of proliferative potential  
555 and gain of effector function by CD8(+) T cells responding to self-antigens. *J Exp Med*  
556 (2002) **196**:323–333. doi:10.1084/jem.20011612
- 557 35. Sarris M, Sixt M. Navigating in tissue mazes: Chemoattractant interpretation in  
558 complex environments. *Curr Opin Cell Biol* (2015) **36**:93–102.  
559 doi:10.1016/j.ceb.2015.08.001
- 560 36. Witt CM, Raychaudhuri S, Schaefer B, Chakraborty AK, Robey EA. Directed  
561 migration of positively selected thymocytes visualized in real time. *PLoS Biol* (2005)  
562 **3**:1062–1069. doi:10.1371/journal.pbio.0030160
- 563 37. Frigerio S, Junt T, Lu B, Gerard C, Zumsteg U, Holländer G a, Piali L. Beta cells are  
564 responsible for CXCR3-mediated T-cell infiltration in insulinitis. *Nat Med* (2002)  
565 **8**:1414–1420. doi:10.1038/nm792
- 566 38. Castellino F, Huang AY, Altan-Bonnet G, Stoll S, Scheinecker C, Germain RN.  
567 Chemokines enhance immunity by guiding naive CD8+ T cells to sites of CD4+ T cell-  
568 dendritic cell interaction. *Nature* (2006) **440**:890–895. doi:10.1038/nature04651
- 569 39. Hickman HD, Reynoso G V., Ngudiankama BF, Cush SS, Gibbs J, Bennink JR,  
570 Yewdell JW. CXCR3 chemokine receptor enables local CD8+ T cell migration for the  
571 destruction of virus-infected cells. *Immunity* (2015) **42**:524–537.  
572 doi:10.1016/j.immuni.2015.02.009
- 573 40. Schlager C, Korner H, Krueger M, Vidoli S, Haberl M, Mielke D, Brylla E, Issekutz T,  
574 Cabanas C, Nelson PJ, et al. Effector T-cell trafficking between the leptomeninges and  
575 the cerebrospinal fluid. *Nature* (2016) **530**:349–353. doi:10.1038/nature16939
- 576 41. Bos R, Sherman LA. CD4+ T-cell help in the tumor milieu is required for recruitment  
577 and cytolytic function of CD8+ T lymphocytes. *Cancer Res* (2010) **70**:8368–8377.  
578 doi:10.1158/0008-5472.CAN-10-1322
- 579 42. Sarkar SA, Lee CE, Victorino F, Nguyen TT, Walters JA, Burrack A, Eberlein J,

- 580 Hildemann SK, Homann D. Expression and regulation of chemokines in murine and  
581 human type 1 diabetes. *Diabetes* (2012) **61**:436–446. doi:10.2337/db11-0853
- 582 43. Harris TH, Banigan EJ, Christian D a., Konradt C, Tait Wojno ED, Norose K, Wilson  
583 EH, John B, Weninger W, Luster AD, et al. Generalized Lévy walks and the role of  
584 chemokines in migration of effector CD8+ T cells. *Nature* (2012) **486**:545–548.  
585 doi:10.1038/nature11098
- 586 44. James A, Plank MJ, Brown R. Optimizing the encounter rate in biological interactions:  
587 Ballistic versus Lévy versus Brownian strategies. *Phys Rev E - Stat Nonlinear, Soft*  
588 *Matter Phys* (2008) **78**: doi:10.1103/PhysRevE.78.051128
- 589 45. Huang JH, Cardenas-Navia LI, Caldwell CC, Plumb TJ, Radu CG, Rocha PN, Wilder  
590 T, Bromberg JS, Cronstein BN, Sitkovsky M, et al. Requirements for T lymphocyte  
591 migration in explanted lymph nodes. *J Immunol* (2007) **178**:7747–7755.  
592 doi:178/12/7747 [pii]
- 593 46. Lim K, Hyun YM, Lambert-Emo K, Capece T, Bae S, Miller R, Topham DJ, Kim M.  
594 Neutrophil trails guide influenza-specific CD8(+) T cells in the airways. *Science (80-*  
595 *)* (2015) **349**:aaa4352. doi:10.1126/science.aaa4352
- 596 47. Meng X, Nikolic-Paterson DJ, Lan HY. TGF- $\beta$ : the master regulator of fibrosis. *Nat*  
597 *Rev Nephrol* (2016) doi:10.1038/nrneph.2016.48
- 598 48. Reichardt P, Patzak I, Jones K, Etemire E, Gunzer M, Hogg N. A role for LFA-1 in  
599 delaying T-lymphocyte egress from lymph nodes. *EMBO J* (2013) **32**:829–43.  
600 doi:10.1038/emboj.2013.33
- 601 49. Bargatze RF, Butcher EC. Rapid G protein-regulated activation event involved in  
602 lymphocyte binding to high endothelial venules. *J Exp Med* (1993) **178**:367–372.  
603 doi:10.1084/jem.178.1.367
- 604 50. Petrie RJ, Doyle AD, Yamada KM. Random versus directionally persistent cell  
605 migration. *Nat Rev Mol Cell Biol* (2009) **10**:538–549. doi:10.1038/nrm2729
- 606 51. Kabashima K, Murata T, Tanaka H, Matsuoka T, Sakata D, Yoshida N, Katagiri K,  
607 Kinashi T, Tanaka T, Miyasaka M, et al. Thromboxane A2 modulates interaction of  
608 dendritic cells and T cells and regulates acquired immunity. *Nat Immunol* (2003)  
609 **4**:694–701. doi:10.1038/ni943
- 610 52. Friedman RS, Lindsay RS, Lilly JK, Nguyen V, Sorensen CM, Jacobelli J, Krummel  
611 MF. An evolving autoimmune microenvironment regulates the quality of effector T  
612 cell restimulation and function. *Proc Natl Acad Sci U S A* (2014) **111**:9223–8.  
613 doi:10.1073/pnas.1322193111
- 614 53. Dustin ML, De Fougères AR. Reprogramming T cells: The role of extracellular matrix  
615 in coordination of T cell activation and migration. *Curr Opin Immunol* (2001) **13**:286–  
616 290. doi:10.1016/S0952-7915(00)00217-X
- 617 54. Boisvert M, Gendron S, Chetoui N, Aoudjit F. Alpha2beta1 integrin signaling  
618 augments T cell receptor-dependent production of interferon-gamma in human T cells.  
619 *Mol Immunol* (2007) **44**:3732–3740. doi:10.1016/j.molimm.2007.04.003

620

621

622

623

624 **FIGURE LEGENDS**

625

626 **Figure 1. Motility of islet-antigen specific CD8<sup>+</sup> and CD4<sup>+</sup> T lymphocytes *in vivo*.**

627 Irradiated InsHA-mCherry mice adoptively transferred with Clone 4-GFP CD8<sup>+</sup> and HNT-CFP  
628 CD4<sup>+</sup> T cells were subjected to intra-vital microscopy on day 8. **A)** Still image from a  
629 representative movie (left panel; scale: 100  $\mu$ m, 200  $\mu$ m Z-projection; red: mCherry, green:  
630 GFP, blue: CFP) (See Video S1), and corresponding T cell tracks (right panel), color-coded as  
631 function of time. Islet is circled. Movie duration: 15 min. **B)** Average velocities of pooled CD4<sup>+</sup>  
632 and CD8<sup>+</sup> T cells in exocrine and endocrine tissues (n = 4 mice/condition; 1-2 movies/mouse,  
633 Mann-Whitney). Dots correspond to individual T cells. **C)** Directionality indexes (ratio between  
634 displacement and total track length) of T cells in exocrine and endocrine tissues (n = 4  
635 mice/condition; 1-2 movies/mouse, Mann-Whitney). Dots correspond to individual T cells. **D)**  
636 Mean squared displacement (MSD) of T cells as function of time in islets, best fitted with a  
637 confined model of migration for Clone4-GFP cells, and with sub-diffusive random-walk for  
638 HNT-CFP cells. Bars correspond to SEM (n = 4 mice/condition; 1-2 movies/mouse). **E)** Still  
639 image from a representative movie in the exocrine tissue (left panel; scale: 100  $\mu$ m, 200  $\mu$ m Z-  
640 projection; green: GFP, blue: CFP) (See Video S2), and corresponding T cell tracks (right  
641 panel), color-coded as function of time. Movie duration: 19 min. **F)** MSD of T cells as function  
642 of time in the exocrine tissue, best fitted with a Lévy-walk model of migration. Between  
643 brackets are R<sup>2</sup> values of fit for ballistic (directed) motility. Bars correspond to SEM (n = 4  
644 mice/condition; 1-2 movies/mouse).

645

646 **Figure 2. T cells collective migration is not biased towards islets and is mostly independent**

647 **of CXCR3 signaling.** Irradiated InsHA-mCherry mice adoptively transferred with Clone 4-

648 GFP CD8<sup>+</sup> and HNT-CFP CD4<sup>+</sup> T cells were subjected to intra-vital microscopy on day 8. **A)**



649 XY projections of track displacement vectors of T cells in movie in Fig. 1A (see Video S1).  
650 Scale: 100  $\mu\text{m}$ . Blue and green tracks correspond to HNT-CFP and Clone 4-GFP T cells,  
651 respectively. Islet is circled, and a cross marks islet centroid. **B)** Clone 4-GFP and HNT-CFP  
652 displacement during movies towards (IN) or away (OUT) from islets, as function of distance  
653 from islet centroid at the start of movies ( $n = 4$  mice; 1-2 movies/mouse). **C)** XY projections of  
654 T cell track displacement vectors in exocrine tissue (See Video S2) (scale: 100  $\mu\text{m}$ , 200  $\mu\text{m}$  Z-  
655 projection; green: GFP, blue: CFP). Movie duration: 10 min. **D)** To analyze orientations of T  
656 cell directions, displacement vectors were projected on the XY plane and set to a common  
657 origin. The orientation of each vector was projected on a circle. **E)** Statistical analysis of T cell  
658 track orientations in 4 different movies (without islet) (numbers in black correspond to number  
659 of tracks). None of the analyzed distributions were significantly different from a uniform  
660 distribution (Hodjes-Ajne test for circular uniformity, P values in red). **F)** Average velocities  
661 of CD4<sup>+</sup> and CD8<sup>+</sup> T cells in the exocrine tissue ( $n = 4-6$  mice/condition; 2-3 movies/mouse,  
662 One-Way Anova). Dots correspond to individual T cells. CXCR3: anti-CXCR3 mAb-treated  
663 mice. **G)** MSD of T cells as function of time in the exocrine tissue, best fitted with a Lévy-walk  
664 super-diffusive model of migration. Bars correspond to SEM ( $n = 4$  mice per condition; 1-2  
665 movies/mouse). **H)** Average velocities of CD4<sup>+</sup> and CD8<sup>+</sup> T cells in islets ( $n = 3-6$   
666 mice/condition; 1 movie/mouse, One-Way Anova). Dots correspond to individual T cells.

667

668 **Figure 3. Blood vessels in the exocrine tissue contribute to effector T cells directed mode**  
669 **of motility.** Irradiated InSHA-mCherry mice adoptively transferred with Clone 4-GFP CD8<sup>+</sup>  
670 and HNT-CFP CD4<sup>+</sup> T cells were subjected to intra-vital microscopy on day 8. **A)** Still images  
671 from movies at day 8 post-transfer (Scale: 100  $\mu\text{m}$ , 200-300  $\mu\text{m}$  Z-projections) (See also Video  
672 S4). **B)** Corresponding T cell tracks in the imaging fields in (A), top and middle panels, color-  
673 coded as function of time. Movies duration: 19 min. **C)** Still image from the movie in (A)

674 bottom panel post-injection of 150 kDa dextran-rhodamine (Scale: 100  $\mu\text{m}$ , 300  $\mu\text{m}$  Z-  
675 projection). **D**) XY projections of track displacement vectors of T cells in movies depicted in  
676 (A). Blue and green tracks correspond to HNT-CFP and Clone 4-GFP T cells, respectively.  
677 Dashed orange lines outline large vessels, and white lines indicate axis used to calculate angles  
678 between displacement vectors and vessel positions. **E**) Angle differences between displacement  
679 vectors of T cells close to vessels (pooled data from Videos S4,  $n = 3$  movies from 3 mice) are  
680 lower than that of T cells away ( $> 30 \mu\text{m}$ ) from vessels (Mann-Whitney). **F**) Average velocities  
681 of T cells close or away from vessels ( $> 30 \mu\text{m}$ ) ( $n = 3$  mice/condition; 1 movie/mouse, Mann-  
682 Whitney). Dots correspond to individual T cells. **G**) MSD of T cells close to ( $< 30 \mu\text{m}$ ) vessels  
683 as function of time, best fitted with a directed model of migration, while other T cells follow a  
684 Lévy walk ( $> 30 \mu\text{m}$  from vessels). Bars correspond to SEM ( $n = 4$  mice, 1 movie/mouse).

685

686 **Figure 4. Effector T cells migrate along ECM fibers, which accumulate at infiltration sites.**

687 Irradiated InsHA-mCherry mice adoptively transferred with Clone 4-GFP and HNT-CFP T  
688 cells were subjected to intra-vital microscopy on day 8. **A**) Still images from a movie at day 8  
689 post-transfer (Scale: 100  $\mu\text{m}$ , 87  $\mu\text{m}$  Z-projection) (See also Videos S5). SHG: second harmonic  
690 generation. Red: rhodamine-dextran. **B**) Still images from a movie at day 8 post-transfer (Scale:  
691 100  $\mu\text{m}$ , 100  $\mu\text{m}$  Z-projection) (See also Videos S8). SHG: second harmonic. **C**) Representative  
692 confocal images of pancreas of a control irradiated InsHA-mCherry mouse, or post-transfer of  
693 T cells (scale: 200  $\mu\text{m}$ , Z-projection of 20  $\mu\text{m}$ ). Islets are circled. **D**) Representative confocal  
694 images of exocrine tissue at day 8 post-transfer (scale: 50  $\mu\text{m}$ , Z-projection of 4  $\mu\text{m}$ ), showing  
695 transferred T cells are in close apposition to fibronectin fibers.

696

697 **Figure 5.  $\beta_1$  integrin-dependent interactions between T cells and the ECM shape T cell**

698 **motility.** Irradiated InsHA-mCherry mice transferred with Clone 4-GFP and HNT-CFP T cells

699 were subjected to intra-vital microscopy on day 8. **A)** XY projections of T cell tracks over 15.2  
700 minutes 35 min after control IgG or anti- $\beta_1$  integrin injection (scale: 100  $\mu$ m) (See also Video  
701 S7). Values indicate number of tracks in movies. **B)** Average velocity of T cells in the exocrine  
702 tissue of isotype and anti-  $\beta_1$  integrin treated animals (n = 3 mice/condition; 1-2 movies/mouse;  
703 Mann-Whitney). Dots correspond to individual cells. **C)** Percentage difference in average  
704 velocity between T cells in the exocrine tissue of isotype and anti- $\beta_1$  integrin-treated animals.  
705 Dots correspond to individual movies (n = 3 mice/condition; 1-2 movies/mouse; P = 0.48,  
706 Mann-Whitney). **D)** Directionality index of T cells in exocrine tissue (n = 3 mice/condition; 1-  
707 2 movies/mouse, Mann-Whitney). **E)** MSD of T cells as function time in the exocrine tissue of  
708 isotype and anti-  $\beta_1$  integrin-treated animals were both best fitted with a model of Lévy-type  
709 super-diffusive migration (solid lines). Between brackets are R<sup>2</sup> values of fit for Brownian  
710 random motility. Bars correspond to SEM (n = 3 mice/condition; 1-2 movies/mouse).

711

712 **Figure 6.  $\beta_1$  integrin blockade alters diabetogenic T cell effector phenotype in the**  
713 **pancreas.** Irradiated InsHA-mCherry mice transferred with Clone 4-GFP CD8<sup>+</sup> and HNT-CFP  
714 CD4<sup>+</sup> T cells were treated with anti- $\beta_1$  mAb or isotype control antibodies on days 8 and 9 after  
715 transfer. At day 10, donor T cells from pancreatic LN (pLN) and pancreas (PA) were analyzed  
716 by FACS gating on living CD8<sup>+</sup> or CD4<sup>+</sup> Thy1.1<sup>+</sup> lymphocytes. **A)** Donor T cells in the  
717 pancreas of treated mice. FACS event counts in the CD8<sup>+</sup> or CD4<sup>+</sup> Thy1.1<sup>+</sup> gates from 3  
718 independent experiments, represented as mean  $\pm$  SEM (n = 8 mice, Mann-Whitney). **B)** Donor  
719 T cells expression of CD25, CD62L and KLRG1. Percentages of indicated subpopulations in  
720 the CD8<sup>+</sup> Thy1.1<sup>+</sup> or CD4<sup>+</sup> Thy1.1<sup>+</sup> gates from 3 independent experiments, represented as  
721 mean  $\pm$  SEM (n = 8 mice, Mann-Whitney). **C)** Intracellular cytokine measurement in donor T  
722 cells. Percentages of IL-2<sup>+</sup> or IFN $\gamma$ <sup>+</sup> cells in the CD8<sup>+</sup> Thy1.1<sup>+</sup> or CD4<sup>+</sup> Thy1.1<sup>+</sup> gates from  
723 2 independent experiments, represented as mean  $\pm$  SEM (n = 6 mice, Mann-Whitney).

Figure 1

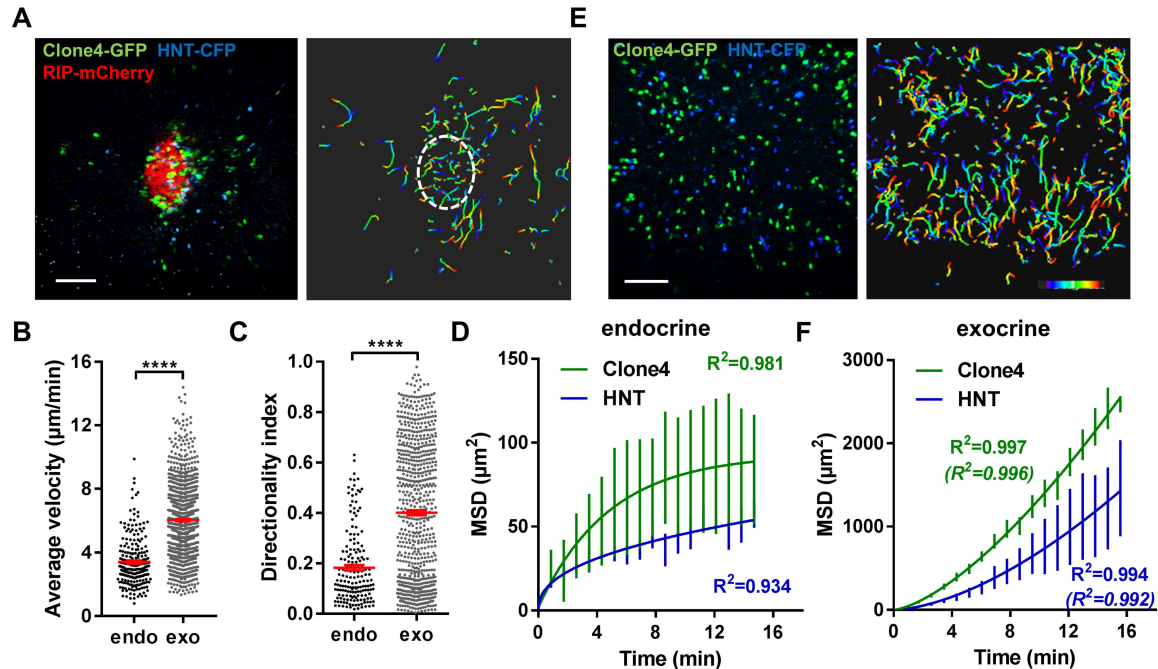



Figure 3

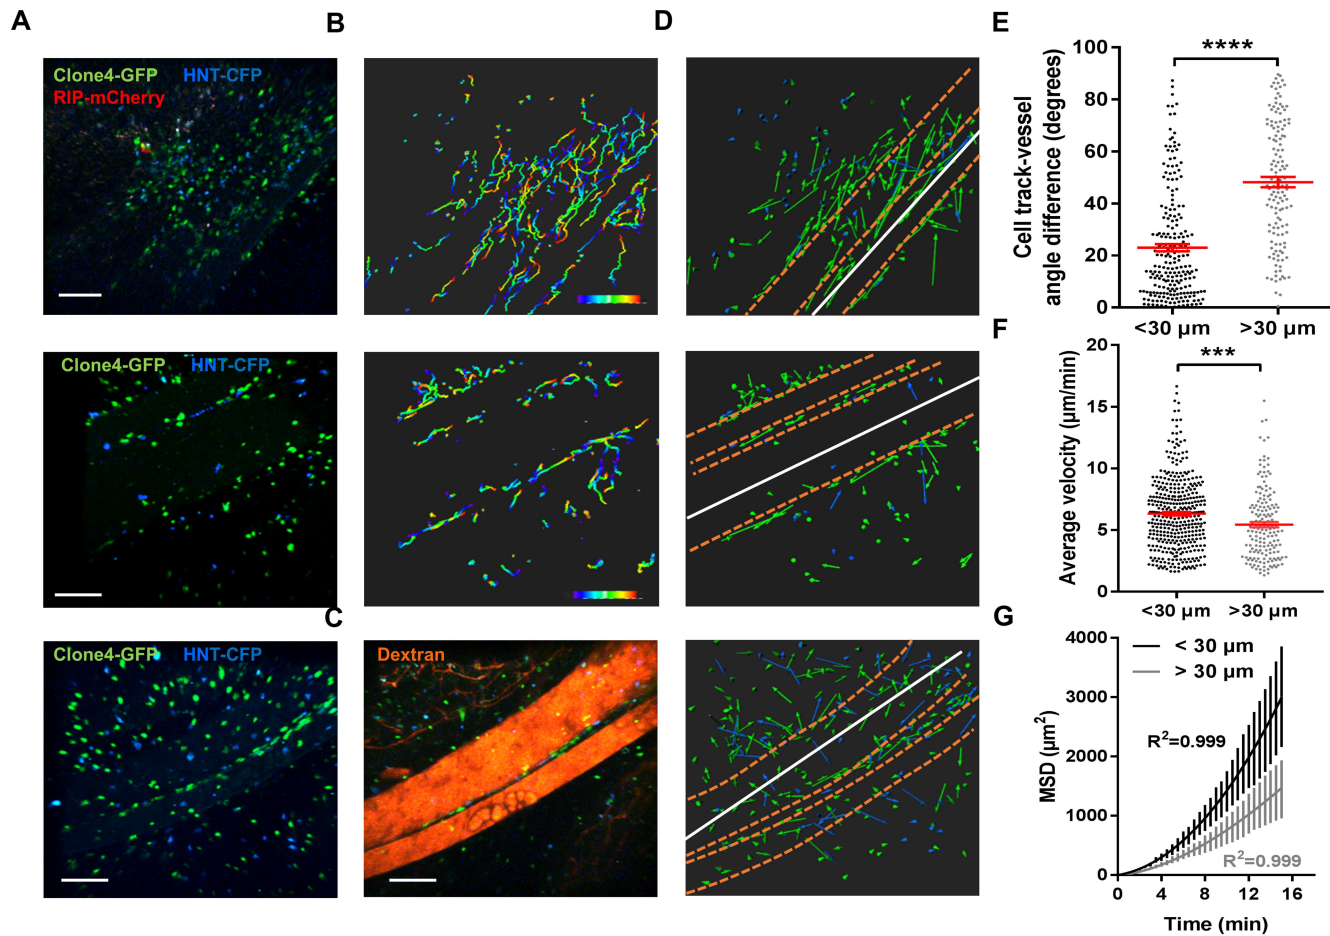

Figure 4

A

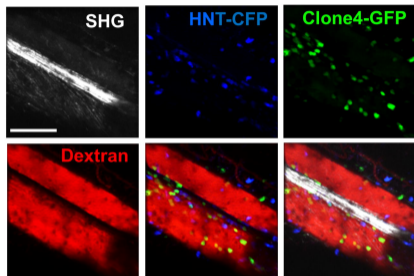

B

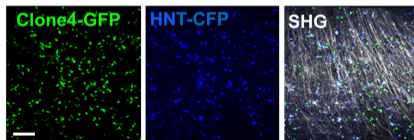

C

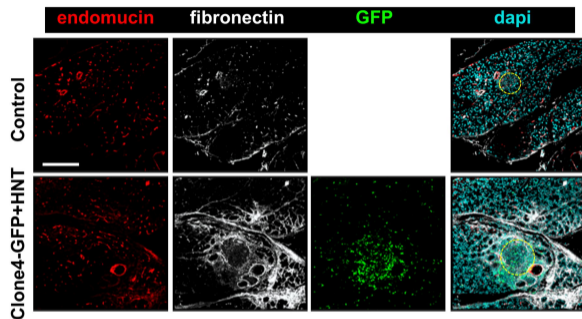

D

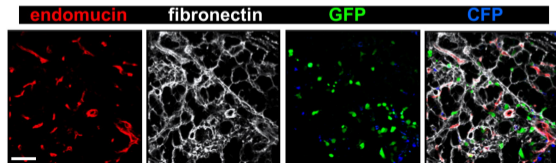

Figure 5

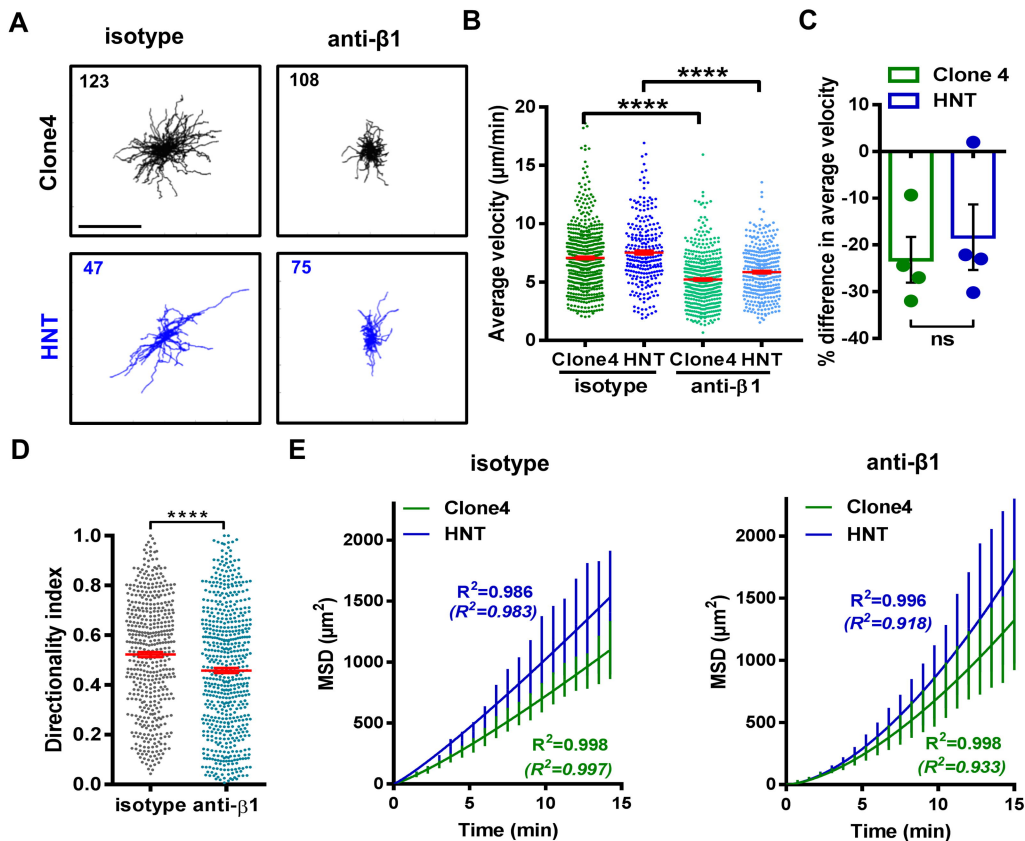



**Figure 6****A**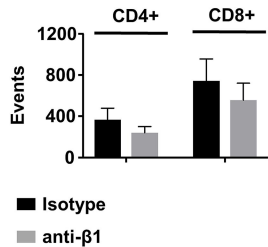**B**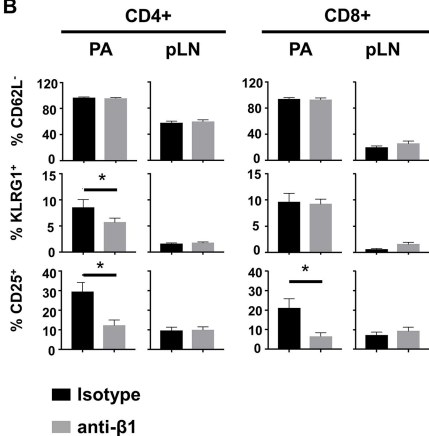**C**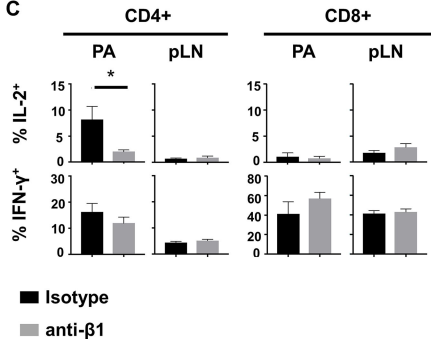

Source: http://biorxiv.org/content/10.1101/277418v1.full.pdf
